# Supplementary material for: Development of a Multiplex Quantitative PCR for Detecting Porcine Epidemic Diarrhea Virus, Transmissible Gastroenteritis Virus, and Porcine Deltacoronavirus Simultaneously in China
Source: MDPI journal article supplement (doi:10.3390/vetsci10060402), 2023-06-18
Supplement: s1 [file s1]

**Table S1.** Results of PCR and qPCR amplification of 462 samples.

| Samples | Province | qPCR |      |       | PCR  |      |       |
|---------|----------|------|------|-------|------|------|-------|
|         |          | PEDV | TGEV | PDCoV | PEDV | TGEV | PDCoV |
| 1       | Jiangsu  | +    | +    | +     | +    | +    | +     |
| 2       | Jiangsu  | +    | +    | +     | +    | +    | +     |
| 3       | Jiangsu  | +    | +    | +     | +    | +    | +     |
| 4       | Jiangsu  | +    | +    | +     | +    | +    | +     |
| 5       | Jiangsu  | +    | +    | +     | +    | +    | +     |
| 6       | Jiangsu  | +    | +    | +     | +    | +    | +     |
| 7       | Jiangsu  | +    | +    | +     | +    | +    | +     |
| 8       | Jiangsu  | +    | +    | +     | -    | +    | +     |
| 9       | Jiangsu  | +    | +    | +     | +    | -    | +     |
| 10      | Jiangsu  | +    | +    | +     | +    | +    | +     |
| 11      | Jiangsu  | +    | +    | +     | +    | +    | +     |
| 12      | Jiangsu  | +    | +    | +     | +    | +    | +     |
| 13      | Jiangsu  | +    | +    | +     | +    | +    | +     |
| 14      | Jiangsu  | +    | +    | +     | -    | +    | +     |
| 15      | Jiangsu  | +    | +    | +     | +    | +    | +     |
| 16      | Jiangsu  | +    | +    | +     | +    | +    | +     |
| 17      | Jiangsu  | +    | +    | +     | +    | +    | +     |
| 18      | Jiangsu  | +    | +    | +     | +    | +    | +     |
| 19      | Jiangsu  | +    | +    | +     | +    | +    | +     |
| 20      | Jiangsu  | +    | +    | +     | +    | -    | +     |
| 21      | Jiangsu  | +    | +    | +     | +    | +    | +     |
| 22      | Jiangsu  | +    | +    | +     | +    | -    | +     |
| 23      | Jiangsu  | +    | +    | +     | +    | +    | +     |
| 24      | Jiangsu  | +    | +    | +     | +    | +    | +     |
| 25      | Jiangsu  | -    | -    | -     | -    | -    | -     |
| 26      | Jiangsu  | -    | -    | -     | -    | -    | -     |
| 27      | Jiangsu  | +    | -    | +     | +    | -    | +     |
| 28      | Jiangsu  | +    | -    | +     | +    | -    | +     |
| 29      | Jiangsu  | +    | -    | +     | +    | -    | +     |
| 30      | Jiangsu  | -    | -    | -     | -    | -    | -     |
| 31      | Jiangsu  | -    | -    | -     | -    | -    | -     |
| 32      | Jiangsu  | -    | -    | +     | -    | -    | +     |
| 33      | Jiangsu  | +    | -    | +     | +    | -    | +     |
| 34      | Jiangsu  | -    | -    | +     | -    | -    | +     |
| 35      | Jiangsu  | +    | -    | +     | +    | -    | +     |
| 36      | Jiangsu  | +    | -    | +     | +    | -    | +     |
| 37      | Jiangsu  | +    | -    | +     | +    | -    | +     |
| 38      | Jiangsu  | +    | -    | +     | +    | -    | +     |
| 39      | Jiangsu  | -    | -    | -     | -    | -    | -     |
| 40      | Jiangsu  | +    | -    | +     | -    | -    | +     |
| 41      | Jiangsu  | +    | -    | -     | -    | -    | -     |

| Samples | Province | qPCR |      |       | PCR  |      |       |
|---------|----------|------|------|-------|------|------|-------|
|         |          | PEDV | TGEV | PDCoV | PEDV | TGEV | PDCoV |
| 42      | Jiangsu  | -    | -    | -     | -    | -    | -     |
| 43      | Jiangsu  | +    | +    | +     | -    | +    | +     |
| 44      | Jiangsu  | -    | -    | -     | -    | -    | -     |
| 45      | Jiangsu  | -    | -    | +     | -    | -    | +     |
| 46      | Jiangsu  | +    | -    | +     | -    | -    | +     |
| 47      | Jiangsu  | +    | +    | +     | -    | -    | +     |
| 48      | Jiangsu  | +    | -    | +     | -    | -    | -     |
| 49      | Jiangsu  | -    | -    | +     | -    | -    | +     |
| 50      | Jiangsu  | -    | -    | +     | -    | -    | +     |
| 51      | Jiangsu  | -    | -    | -     | -    | -    | -     |
| 52      | Jiangsu  | -    | -    | -     | -    | -    | -     |
| 53      | Jiangsu  | -    | -    | +     | -    | -    | +     |
| 54      | Jiangsu  | -    | -    | -     | -    | -    | -     |
| 55      | Jiangsu  | -    | -    | -     | -    | -    | -     |
| 56      | Jiangsu  | -    | -    | -     | -    | -    | -     |
| 57      | Jiangsu  | -    | -    | -     | -    | -    | -     |
| 58      | Jiangsu  | +    | -    | +     | +    | -    | +     |
| 59      | Jiangsu  | -    | -    | -     | -    | -    | -     |
| 60      | Jiangsu  | -    | -    | +     | -    | -    | +     |
| 61      | Jiangsu  | -    | -    | -     | -    | -    | -     |
| 62      | Jiangsu  | -    | -    | -     | -    | -    | -     |
| 63      | Jiangsu  | -    | -    | +     | -    | -    | +     |
| 64      | Jiangsu  | -    | -    | -     | -    | -    | -     |
| 65      | Jiangsu  | -    | -    | -     | -    | -    | -     |
| 66      | Jiangsu  | -    | -    | -     | -    | -    | -     |
| 67      | Jiangsu  | -    | -    | -     | -    | -    | -     |
| 68      | Jiangsu  | -    | -    | -     | -    | -    | -     |
| 69      | Jiangsu  | +    | -    | +     | +    | -    | +     |
| 70      | Jiangsu  | -    | -    | -     | -    | -    | -     |
| 71      | Jiangsu  | +    | +    | +     | +    | +    | +     |
| 72      | Jiangsu  | -    | -    | -     | -    | -    | -     |
| 73      | Jiangsu  | +    | -    | +     | +    | -    | +     |
| 74      | Jiangsu  | +    | -    | +     | +    | -    | -     |
| 75      | Jiangsu  | -    | -    | +     | -    | -    | +     |
| 76      | Jiangsu  | -    | -    | -     | -    | -    | -     |
| 77      | Jiangsu  | +    | +    | +     | +    | +    | +     |
| 78      | Jiangsu  | +    | +    | +     | +    | +    | +     |
| 79      | Jiangsu  | +    | -    | +     | +    | -    | +     |
| 80      | Jiangsu  | -    | -    | -     | -    | -    | -     |
| 81      | Jiangsu  | -    | -    | -     | -    | -    | -     |
| 82      | Jiangsu  | +    | -    | +     | +    | -    | +     |
| 83      | Jiangsu  | +    | -    | +     | +    | -    | +     |

| Samples | Province | qPCR |      |       | PCR  |      |       |
|---------|----------|------|------|-------|------|------|-------|
|         |          | PEDV | TGEV | PDCoV | PEDV | TGEV | PDCoV |
| 84      | Jiangsu  | +    | -    | -     | +    | -    | -     |
| 85      | Jiangsu  | +    | -    | -     | +    | -    | -     |
| 86      | Jiangsu  | +    | -    | +     | +    | -    | +     |
| 87      | Jiangsu  | +    | -    | +     | +    | -    | +     |
| 88      | Jiangsu  | +    | -    | +     | +    | -    | +     |
| 89      | Jiangsu  | +    | -    | +     | +    | -    | +     |
| 90      | Jiangsu  | +    | -    | -     | +    | -    | -     |
| 91      | Jiangsu  | +    | -    | +     | +    | -    | +     |
| 92      | Jiangsu  | +    | -    | +     | +    | -    | -     |
| 93      | Jiangsu  | +    | +    | +     | +    | +    | +     |
| 94      | Jiangsu  | +    | -    | +     | +    | -    | +     |
| 95      | Jiangsu  | -    | -    | -     | -    | -    | -     |
| 96      | Jiangsu  | -    | -    | -     | -    | -    | -     |
| 97      | Jiangsu  | +    | +    | +     | +    | +    | +     |
| 98      | Jiangsu  | -    | -    | -     | -    | -    | -     |
| 99      | Jiangsu  | +    | -    | +     | +    | -    | +     |
| 100     | Jiangsu  | +    | -    | +     | +    | -    | +     |
| 101     | Jiangsu  | +    | -    | +     | +    | -    | +     |
| 102     | Jiangsu  | +    | -    | -     | +    | -    | -     |
| 103     | Jiangsu  | +    | -    | +     | +    | -    | +     |
| 104     | Jiangsu  | -    | -    | -     | -    | -    | -     |
| 105     | Jiangsu  | -    | -    | +     | -    | -    | +     |
| 106     | Jiangsu  | -    | -    | -     | -    | -    | -     |
| 107     | Jiangsu  | -    | -    | -     | -    | -    | -     |
| 108     | Jiangsu  | -    | -    | -     | -    | -    | -     |
| 109     | Jiangsu  | -    | -    | +     | -    | -    | +     |
| 110     | Jiangsu  | -    | -    | -     | -    | -    | -     |
| 111     | Jiangsu  | -    | -    | -     | -    | -    | -     |
| 112     | Jiangsu  | -    | -    | -     | -    | -    | -     |
| 113     | Jiangsu  | -    | -    | -     | -    | -    | -     |
| 114     | Jiangsu  | -    | -    | -     | -    | -    | -     |
| 115     | Jiangsu  | -    | -    | -     | -    | -    | -     |
| 116     | Jiangsu  | +    | -    | +     | +    | -    | +     |
| 117     | Jiangsu  | -    | -    | -     | -    | -    | -     |
| 118     | Jiangsu  | -    | -    | -     | -    | -    | -     |
| 119     | Jiangsu  | -    | -    | +     | -    | -    | +     |
| 120     | Jiangsu  | -    | -    | -     | -    | -    | -     |
| 121     | Jiangsu  | -    | -    | +     | -    | -    | +     |
| 122     | Jiangsu  | -    | -    | -     | -    | -    | -     |
| 123     | Jiangsu  | -    | -    | -     | -    | -    | -     |
| 124     | Jiangsu  | +    | -    | +     | +    | -    | +     |
| 125     | Jiangsu  | +    | -    | +     | +    | -    | +     |

| Samples | Province | qPCR |      |       | PCR  |      |       |
|---------|----------|------|------|-------|------|------|-------|
|         |          | PEDV | TGEV | PDCoV | PEDV | TGEV | PDCoV |
| 126     | Jiangsu  | -    | -    | -     | -    | -    | -     |
| 127     | Jiangsu  | -    | -    | +     | -    | -    | +     |
| 128     | Jiangsu  | -    | -    | +     | -    | -    | +     |
| 129     | Jiangsu  | -    | -    | -     | -    | -    | -     |
| 130     | Jiangsu  | -    | -    | -     | -    | -    | -     |
| 131     | Jiangsu  | -    | -    | -     | -    | -    | -     |
| 132     | Jiangsu  | +    | -    | +     | +    | -    | +     |
| 133     | Jiangsu  | +    | -    | -     | +    | -    | -     |
| 134     | Jiangsu  | -    | -    | -     | -    | -    | -     |
| 135     | Jiangsu  | +    | -    | +     | +    | -    | +     |
| 136     | Jiangsu  | +    | -    | +     | +    | -    | -     |
| 137     | Jiangsu  | +    | -    | +     | +    | -    | +     |
| 138     | Jiangsu  | -    | -    | -     | -    | -    | -     |
| 139     | Jiangsu  | -    | -    | -     | -    | -    | -     |
| 140     | Jiangsu  | +    | -    | +     | +    | -    | +     |
| 141     | Jiangsu  | -    | -    | -     | -    | -    | -     |
| 142     | Jiangsu  | +    | -    | +     | +    | -    | +     |
| 143     | Jiangsu  | +    | -    | +     | +    | -    | +     |
| 144     | Jiangsu  | -    | -    | +     | -    | -    | +     |
| 145     | Jiangsu  | +    | +    | +     | +    | +    | -     |
| 146     | Shandong | +    | -    | +     | +    | -    | +     |
| 147     | Shandong | +    | -    | +     | +    | -    | +     |
| 148     | Shandong | +    | -    | +     | +    | -    | +     |
| 149     | Shandong | +    | -    | +     | -    | -    | +     |
| 150     | Shandong | +    | -    | +     | +    | -    | +     |
| 151     | Shandong | +    | -    | +     | +    | -    | +     |
| 152     | Shandong | +    | -    | +     | +    | -    | +     |
| 153     | Shandong | -    | -    | -     | -    | -    | -     |
| 154     | Shandong | +    | -    | +     | +    | -    | +     |
| 155     | Shandong | +    | -    | +     | +    | -    | -     |
| 156     | Shandong | +    | -    | +     | +    | -    | +     |
| 157     | Shandong | -    | -    | -     | -    | -    | -     |
| 158     | Shandong | +    | +    | +     | +    | +    | +     |
| 159     | Shandong | -    | -    | -     | -    | -    | -     |
| 160     | Shandong | -    | -    | -     | -    | -    | -     |
| 161     | Shandong | -    | -    | -     | -    | -    | -     |
| 162     | Shandong | -    | -    | -     | -    | -    | -     |
| 163     | Shandong | -    | -    | -     | -    | -    | -     |
| 164     | Shandong | -    | -    | -     | -    | -    | -     |
| 165     | Shandong | -    | -    | -     | -    | -    | -     |
| 166     | Shandong | -    | -    | -     | -    | -    | -     |
| 167     | Shandong | -    | -    | -     | -    | -    | -     |



| Samples | Province | qPCR |      |       | PCR  |      |       |
|---------|----------|------|------|-------|------|------|-------|
|         |          | PEDV | TGEV | PDCoV | PEDV | TGEV | PDCoV |
| 168     | Shandong | -    | -    | -     | -    | -    | -     |
| 169     | Shandong | -    | -    | -     | -    | -    | -     |
| 170     | Shandong | -    | -    | -     | -    | -    | -     |
| 171     | Shandong | -    | -    | -     | -    | -    | -     |
| 172     | Shandong | +    | +    | +     | +    | +    | +     |
| 173     | Shandong | +    | +    | -     | +    | +    | -     |
| 174     | Shandong | -    | -    | -     | -    | -    | -     |
| 175     | Shandong | -    | -    | -     | -    | -    | -     |
| 176     | Shandong | -    | -    | -     | -    | -    | -     |
| 177     | Shandong | -    | -    | -     | -    | -    | -     |
| 178     | Shandong | -    | -    | -     | -    | -    | -     |
| 179     | Shandong | -    | -    | -     | -    | -    | -     |
| 180     | Shandong | -    | -    | -     | -    | -    | -     |
| 181     | Shandong | -    | -    | -     | -    | -    | -     |
| 182     | Shandong | +    | -    | +     | +    | -    | +     |
| 183     | Shandong | +    | -    | +     | +    | -    | +     |
| 184     | Shandong | +    | -    | -     | +    | -    | -     |
| 185     | Shandong | +    | -    | -     | +    | -    | -     |
| 186     | Shandong | +    | -    | -     | +    | -    | -     |
| 187     | Shandong | +    | -    | -     | +    | -    | -     |
| 188     | Shandong | +    | -    | -     | -    | -    | -     |
| 189     | Shandong | +    | -    | -     | +    | -    | -     |
| 190     | Shandong | +    | -    | -     | +    | -    | -     |
| 191     | Shandong | +    | -    | -     | +    | -    | -     |
| 192     | Shandong | +    | -    | -     | +    | -    | -     |
| 193     | Shandong | +    | -    | -     | +    | -    | -     |
| 194     | Shandong | +    | -    | -     | +    | -    | -     |
| 195     | Shandong | +    | -    | +     | +    | -    | +     |
| 196     | Shandong | +    | -    | +     | +    | -    | -     |
| 197     | Shandong | +    | -    | +     | +    | -    | +     |
| 198     | Shandong | +    | -    | -     | +    | -    | -     |
| 199     | Shandong | +    | -    | -     | +    | -    | -     |
| 200     | Shandong | +    | -    | -     | +    | -    | -     |
| 201     | Shandong | +    | -    | +     | +    | -    | +     |
| 202     | Shandong | +    | -    | -     | +    | -    | -     |
| 203     | Shandong | +    | -    | +     | +    | -    | +     |
| 204     | Shandong | -    | -    | -     | -    | -    | -     |
| 205     | Shandong | -    | -    | -     | -    | -    | -     |
| 206     | Shandong | -    | -    | -     | -    | -    | -     |
| 207     | Shandong | +    | -    | +     | +    | -    | -     |
| 208     | Shandong | -    | -    | -     | -    | -    | -     |
| 209     | Shandong | -    | -    | -     | -    | -    | -     |

| Samples | Province  | qPCR |      |       | PCR  |      |       |
|---------|-----------|------|------|-------|------|------|-------|
|         |           | PEDV | TGEV | PDCoV | PEDV | TGEV | PDCoV |
| 210     | Guangdong | -    | -    | -     | -    | -    | -     |
| 211     | Guangdong | -    | -    | -     | -    | -    | -     |
| 212     | Guangdong | -    | -    | -     | -    | -    | -     |
| 213     | Guangdong | -    | -    | -     | -    | -    | -     |
| 214     | Guangdong | -    | -    | -     | -    | -    | -     |
| 215     | Guangdong | -    | -    | -     | -    | -    | -     |
| 216     | Guangdong | -    | -    | -     | -    | -    | -     |
| 217     | Guangdong | -    | -    | -     | -    | -    | -     |
| 218     | Guangdong | -    | -    | -     | -    | -    | -     |
| 219     | Guangdong | +    | -    | -     | +    | -    | -     |
| 220     | Guangdong | +    | -    | -     | +    | -    | -     |
| 221     | Guangdong | +    | -    | -     | +    | -    | -     |
| 222     | Guangdong | -    | -    | -     | -    | -    | -     |
| 223     | Guangdong | +    | -    | -     | +    | -    | -     |
| 224     | Guangdong | +    | -    | -     | +    | -    | -     |
| 225     | Guangdong | -    | -    | -     | -    | -    | -     |
| 226     | Guangdong | -    | -    | -     | -    | -    | -     |
| 227     | Guangdong | -    | -    | -     | -    | -    | -     |
| 228     | Guangdong | -    | -    | -     | -    | -    | -     |
| 229     | Guangdong | -    | -    | -     | -    | -    | -     |
| 230     | Guangdong | -    | -    | -     | -    | -    | -     |
| 231     | Guangdong | -    | +    | -     | -    | +    | -     |
| 232     | Guangdong | +    | +    | +     | +    | +    | +     |
| 233     | Guangdong | +    | +    | +     | +    | +    | +     |
| 234     | Guangdong | +    | +    | +     | +    | +    | +     |
| 235     | Guangdong | +    | -    | +     | +    | -    | +     |
| 236     | Guangdong | +    | -    | +     | +    | -    | +     |
| 237     | Guangdong | +    | +    | +     | +    | +    | +     |
| 238     | Guangdong | +    | -    | +     | +    | -    | +     |
| 239     | Guangdong | +    | -    | +     | +    | -    | +     |
| 240     | Guangdong | +    | -    | +     | +    | -    | +     |
| 241     | Guangdong | +    | +    | +     | +    | +    | +     |
| 242     | Guangdong | +    | +    | +     | +    | +    | -     |
| 243     | Guangdong | +    | +    | +     | +    | +    | +     |
| 244     | Guangdong | +    | -    | +     | +    | -    | +     |
| 245     | Guangdong | +    | -    | +     | +    | -    | +     |
| 246     | Guangdong | +    | -    | +     | +    | -    | +     |
| 247     | Guangdong | +    | +    | +     | +    | +    | +     |
| 248     | Guangdong | +    | +    | +     | +    | +    | +     |
| 249     | Guangdong | +    | +    | +     | +    | +    | +     |
| 250     | Guangdong | +    | +    | +     | +    | +    | +     |
| 251     | Guangdong | +    | -    | +     | +    | -    | +     |

| Samples | Province  | qPCR |      |       | PCR  |      |       |
|---------|-----------|------|------|-------|------|------|-------|
|         |           | PEDV | TGEV | PDCoV | PEDV | TGEV | PDCoV |
| 252     | Guangdong | -    | -    | -     | -    | -    | -     |
| 253     | Guangdong | +    | -    | +     | +    | -    | +     |
| 254     | Guangdong | +    | -    | +     | +    | -    | +     |
| 255     | Guangdong | +    | -    | +     | +    | -    | +     |
| 256     | Guangdong | +    | -    | +     | +    | -    | +     |
| 257     | Guangdong | +    | -    | +     | +    | -    | +     |
| 258     | Guangdong | +    | -    | +     | +    | -    | +     |
| 259     | Guangdong | +    | -    | +     | +    | -    | +     |
| 260     | Guangdong | +    | -    | +     | +    | -    | +     |
| 261     | Guangdong | +    | -    | +     | +    | -    | +     |
| 262     | Guangdong | +    | -    | +     | +    | -    | +     |
| 263     | Guangdong | +    | -    | +     | +    | -    | +     |
| 264     | Guangdong | +    | -    | +     | +    | -    | +     |
| 265     | Guangdong | +    | -    | +     | +    | -    | +     |
| 266     | Guangdong | +    | -    | +     | +    | -    | +     |
| 267     | Guangdong | +    | -    | +     | +    | -    | +     |
| 268     | Guangdong | +    | -    | +     | +    | -    | +     |
| 269     | Guangdong | -    | -    | +     | -    | -    | +     |
| 270     | Guangdong | -    | -    | +     | -    | -    | +     |
| 271     | Guangdong | -    | -    | +     | -    | -    | +     |
| 272     | Guangdong | -    | -    | +     | -    | -    | +     |
| 273     | Guangdong | -    | -    | +     | -    | -    | +     |
| 274     | Guangdong | -    | -    | +     | -    | -    | +     |
| 275     | Guangdong | -    | -    | +     | -    | -    | +     |
| 276     | Guangdong | -    | -    | +     | -    | -    | +     |
| 277     | Guangdong | -    | -    | +     | -    | -    | +     |
| 278     | Guangdong | -    | -    | +     | -    | -    | +     |
| 279     | Guangdong | -    | -    | +     | -    | -    | +     |
| 280     | Guangdong | -    | -    | +     | -    | -    | +     |
| 281     | Guangdong | -    | -    | +     | -    | -    | +     |
| 282     | Guangdong | -    | -    | +     | -    | -    | +     |
| 283     | Guangdong | -    | -    | +     | -    | -    | +     |
| 284     | Guangdong | -    | -    | +     | -    | -    | +     |
| 285     | Guangdong | -    | -    | -     | -    | -    | -     |
| 286     | Guangdong | -    | -    | +     | -    | -    | +     |
| 287     | Guangdong | -    | -    | +     | -    | -    | +     |
| 288     | Guangdong | -    | -    | +     | -    | -    | +     |
| 289     | Guangdong | +    | -    | +     | +    | -    | +     |
| 290     | Guangdong | +    | -    | +     | +    | -    | +     |
| 291     | Guangdong | -    | -    | -     | -    | -    | -     |
| 292     | Guangdong | -    | -    | -     | -    | -    | -     |
| 293     | Guangdong | -    | -    | -     | -    | -    | -     |

| Samples | Province  | qPCR |      |       | PCR  |      |       |
|---------|-----------|------|------|-------|------|------|-------|
|         |           | PEDV | TGEV | PDCoV | PEDV | TGEV | PDCoV |
| 294     | Guangdong | -    | -    | +     | -    | -    | +     |
| 295     | Guangdong | -    | -    | +     | -    | -    | +     |
| 296     | Guangdong | -    | -    | -     | -    | -    | -     |
| 297     | Guangdong | -    | -    | -     | -    | -    | -     |
| 298     | Guangdong | +    | -    | -     | +    | -    | -     |
| 299     | Guangdong | -    | -    | -     | -    | -    | -     |
| 300     | Guangdong | +    | -    | +     | +    | -    | +     |
| 301     | Guangdong | +    | -    | -     | +    | -    | -     |
| 302     | Guangdong | -    | -    | -     | -    | -    | -     |
| 303     | Guangdong | +    | -    | -     | +    | -    | -     |
| 304     | Guangdong | +    | -    | +     | +    | -    | +     |
| 305     | Guangdong | +    | -    | -     | +    | -    | -     |
| 306     | Guangdong | +    | -    | -     | +    | -    | -     |
| 307     | Hubei     | -    | -    | -     | -    | -    | -     |
| 308     | Hubei     | +    | -    | -     | +    | -    | -     |
| 309     | Hubei     | -    | -    | -     | -    | -    | -     |
| 310     | Hubei     | -    | -    | -     | -    | -    | -     |
| 311     | Hubei     | -    | -    | -     | -    | -    | -     |
| 312     | Hubei     | -    | +    | -     | -    | +    | -     |
| 313     | Hubei     | +    | -    | -     | +    | -    | -     |
| 314     | Hubei     | -    | -    | -     | -    | -    | -     |
| 315     | Hubei     | -    | -    | -     | -    | -    | -     |
| 316     | Hubei     | -    | -    | -     | -    | -    | -     |
| 317     | Hubei     | +    | +    | +     | +    | +    | +     |
| 318     | Hubei     | -    | -    | -     | -    | -    | -     |
| 319     | Hubei     | -    | -    | -     | -    | -    | -     |
| 320     | Hubei     | -    | -    | -     | -    | -    | -     |
| 321     | Hubei     | -    | -    | -     | -    | -    | -     |
| 322     | Hubei     | +    | -    | -     | +    | -    | -     |
| 323     | Hubei     | -    | -    | -     | -    | -    | -     |
| 324     | Hubei     | -    | -    | -     | -    | -    | -     |
| 325     | Hubei     | -    | -    | -     | -    | -    | -     |
| 326     | Hubei     | -    | +    | -     | -    | +    | -     |
| 327     | Hubei     | +    | -    | -     | +    | -    | -     |
| 328     | Hubei     | -    | -    | -     | -    | -    | -     |
| 329     | Hubei     | -    | +    | +     | -    | +    | +     |
| 330     | Hubei     | -    | -    | -     | -    | -    | -     |
| 331     | Hubei     | -    | -    | -     | -    | -    | -     |
| 332     | Hubei     | -    | -    | -     | -    | -    | -     |
| 333     | Hubei     | -    | +    | -     | -    | +    | -     |
| 334     | Hubei     | -    | -    | -     | -    | -    | -     |
| 335     | Hubei     | -    | -    | -     | -    | -    | -     |

| Samples | Province | qPCR |      |       | PCR  |      |       |
|---------|----------|------|------|-------|------|------|-------|
|         |          | PEDV | TGEV | PDCoV | PEDV | TGEV | PDCoV |
| 336     | Hubei    | -    | -    | -     | -    | -    | -     |
| 337     | Hubei    | -    | -    | -     | -    | -    | -     |
| 338     | Hubei    | -    | -    | -     | -    | -    | -     |
| 339     | Hubei    | -    | -    | -     | -    | -    | -     |
| 340     | Hubei    | -    | -    | -     | -    | -    | -     |
| 341     | Hubei    | -    | -    | -     | -    | -    | -     |
| 342     | Hubei    | -    | -    | -     | -    | -    | -     |
| 343     | Hubei    | -    | -    | -     | -    | -    | -     |
| 344     | Hubei    | -    | -    | -     | -    | -    | -     |
| 345     | Hubei    | -    | -    | +     | -    | -    | +     |
| 346     | Hubei    | -    | -    | -     | -    | -    | -     |
| 347     | Hubei    | -    | -    | -     | -    | -    | -     |
| 348     | Hubei    | -    | -    | -     | -    | -    | -     |
| 349     | Hubei    | -    | -    | -     | -    | -    | -     |
| 350     | Hubei    | -    | -    | -     | -    | -    | -     |
| 351     | Hubei    | +    | -    | -     | +    | -    | -     |
| 352     | Hubei    | +    | -    | -     | +    | -    | -     |
| 353     | Hubei    | +    | -    | -     | +    | -    | -     |
| 354     | Hubei    | +    | -    | -     | +    | -    | -     |
| 355     | Hubei    | +    | -    | -     | +    | -    | -     |
| 356     | Hubei    | +    | -    | -     | +    | -    | -     |
| 357     | Hubei    | +    | -    | -     | +    | -    | -     |
| 358     | Hubei    | +    | -    | -     | +    | -    | -     |
| 359     | Hubei    | +    | -    | -     | +    | -    | -     |
| 360     | Hubei    | +    | -    | -     | +    | -    | -     |
| 361     | Hubei    | +    | -    | -     | +    | -    | -     |
| 362     | Hubei    | +    | -    | -     | +    | -    | -     |
| 363     | Hubei    | +    | -    | -     | +    | -    | -     |
| 364     | Hubei    | +    | -    | -     | +    | -    | -     |
| 365     | Hubei    | +    | -    | -     | +    | -    | -     |
| 366     | Hubei    | +    | -    | -     | +    | -    | -     |
| 367     | Hubei    | +    | -    | -     | +    | -    | -     |
| 368     | Hubei    | +    | -    | +     | +    | -    | +     |
| 369     | Hubei    | +    | -    | -     | +    | -    | -     |
| 370     | Hubei    | +    | -    | -     | +    | -    | -     |
| 371     | Hubei    | +    | -    | -     | +    | -    | -     |
| 372     | Hubei    | +    | -    | -     | +    | -    | -     |
| 373     | Hubei    | +    | -    | -     | +    | -    | -     |
| 374     | Hubei    | +    | -    | -     | +    | -    | -     |
| 375     | Hubei    | +    | -    | -     | +    | -    | -     |
| 376     | Hubei    | +    | -    | -     | +    | -    | -     |
| 377     | Hubei    | +    | -    | +     | +    | -    | +     |

| Samples | Province | qPCR |      |       | PCR  |      |       |
|---------|----------|------|------|-------|------|------|-------|
|         |          | PEDV | TGEV | PDCoV | PEDV | TGEV | PDCoV |
| 378     | Hubei    | +    | -    | -     | +    | -    | -     |
| 379     | Hubei    | +    | -    | -     | +    | -    | -     |
| 380     | Hubei    | +    | -    | -     | +    | -    | -     |
| 381     | Hubei    | +    | -    | +     | +    | -    | +     |
| 382     | Hubei    | +    | -    | +     | +    | -    | +     |
| 383     | Hubei    | +    | -    | +     | +    | -    | +     |
| 384     | Hubei    | +    | -    | +     | +    | -    | +     |
| 385     | Hubei    | +    | -    | +     | +    | -    | +     |
| 386     | Hubei    | +    | -    | -     | +    | -    | -     |
| 387     | Hubei    | +    | -    | +     | +    | -    | +     |
| 388     | Hubei    | +    | -    | +     | +    | -    | +     |
| 389     | Hubei    | +    | -    | -     | +    | -    | -     |
| 390     | Hubei    | +    | -    | -     | +    | -    | -     |
| 391     | Hubei    | +    | -    | -     | +    | -    | -     |
| 392     | Hubei    | +    | -    | +     | +    | -    | +     |
| 393     | Hubei    | +    | -    | -     | +    | -    | -     |
| 394     | Hubei    | +    | -    | +     | +    | -    | +     |
| 395     | Hubei    | +    | -    | +     | +    | -    | +     |
| 396     | Hubei    | +    | -    | -     | +    | -    | -     |
| 397     | Hubei    | +    | -    | +     | +    | -    | +     |
| 398     | Hubei    | +    | -    | +     | +    | -    | +     |
| 399     | Hunan    | +    | -    | +     | +    | -    | +     |
| 400     | Hunan    | +    | +    | +     | +    | +    | +     |
| 401     | Hunan    | +    | +    | +     | +    | +    | +     |
| 402     | Hunan    | +    | +    | +     | +    | +    | +     |
| 403     | Hunan    | +    | +    | +     | +    | +    | +     |
| 404     | Hunan    | +    | +    | +     | +    | +    | +     |
| 405     | Hunan    | -    | -    | +     | -    | -    | +     |
| 406     | Hunan    | +    | -    | +     | +    | -    | +     |
| 407     | Hunan    | +    | -    | +     | +    | -    | +     |
| 408     | Hunan    | +    | -    | +     | +    | -    | +     |
| 409     | Hunan    | +    | +    | +     | +    | +    | +     |
| 410     | Hunan    | -    | -    | -     | -    | -    | -     |
| 411     | Hunan    | -    | -    | +     | -    | -    | +     |
| 412     | Hunan    | +    | +    | +     | +    | +    | +     |
| 413     | Hunan    | +    | +    | +     | +    | +    | +     |
| 414     | Hunan    | +    | -    | +     | +    | -    | +     |
| 415     | Hunan    | +    | -    | +     | +    | -    | +     |
| 416     | Hunan    | -    | -    | -     | -    | -    | -     |
| 417     | Hunan    | +    | +    | +     | +    | +    | +     |
| 418     | Hunan    | +    | -    | +     | +    | -    | +     |
| 419     | Hunan    | +    | -    | -     | +    | -    | -     |

| Samples | Province | qPCR |      |       | PCR  |      |       |
|---------|----------|------|------|-------|------|------|-------|
|         |          | PEDV | TGEV | PDCoV | PEDV | TGEV | PDCoV |
| 420     | Hunan    | +    | -    | -     | +    | -    | -     |
| 421     | Hunan    | +    | -    | -     | +    | -    | -     |
| 422     | Hunan    | +    | -    | -     | +    | -    | -     |
| 423     | Hunan    | +    | +    | -     | +    | +    | -     |
| 424     | Hunan    | +    | +    | -     | +    | +    | -     |
| 425     | Hunan    | +    | +    | -     | +    | +    | -     |
| 426     | Hunan    | +    | -    | -     | +    | -    | -     |
| 427     | Hunan    | +    | -    | -     | +    | -    | -     |
| 428     | Hunan    | +    | +    | -     | +    | +    | -     |
| 429     | Hunan    | +    | +    | -     | +    | +    | -     |
| 430     | Hunan    | +    | -    | -     | +    | -    | -     |
| 431     | Hunan    | +    | -    | -     | +    | -    | -     |
| 432     | Hunan    | +    | +    | -     | +    | +    | -     |
| 433     | Hunan    | +    | -    | -     | +    | -    | -     |
| 434     | Hunan    | +    | -    | -     | +    | -    | -     |
| 435     | Hunan    | +    | +    | -     | +    | +    | -     |
| 436     | Hunan    | +    | -    | -     | +    | -    | -     |
| 437     | Hunan    | +    | +    | -     | +    | +    | -     |
| 438     | Hunan    | +    | +    | -     | +    | +    | -     |
| 439     | Hunan    | +    | +    | -     | +    | +    | -     |
| 440     | Hunan    | +    | -    | -     | +    | -    | -     |
| 441     | Hunan    | +    | +    | -     | +    | +    | -     |
| 442     | Hunan    | +    | -    | -     | +    | -    | -     |
| 443     | Hunan    | +    | -    | -     | +    | -    | -     |
| 444     | Hunan    | +    | -    | -     | +    | -    | -     |
| 445     | Hunan    | +    | -    | -     | +    | -    | -     |
| 446     | Hunan    | +    | -    | -     | +    | -    | -     |
| 447     | Hunan    | +    | -    | -     | +    | -    | -     |
| 448     | Hunan    | +    | -    | -     | +    | -    | -     |
| 449     | Hunan    | +    | -    | -     | +    | -    | -     |
| 450     | Hunan    | +    | -    | -     | +    | -    | -     |
| 451     | Hunan    | +    | -    | -     | +    | -    | -     |
| 452     | Hunan    | +    | +    | -     | +    | +    | -     |
| 453     | Hunan    | +    | +    | -     | +    | +    | -     |
| 454     | Hunan    | +    | +    | -     | +    | +    | -     |
| 455     | Hunan    | -    | -    | +     | -    | -    | +     |
| 456     | Hunan    | -    | -    | +     | -    | -    | +     |
| 457     | Hunan    | -    | -    | +     | -    | -    | +     |
| 458     | Hunan    | -    | -    | +     | -    | -    | +     |
| 459     | Hunan    | -    | -    | +     | -    | -    | +     |
| 460     | Hunan    | -    | -    | -     | -    | -    | -     |
| 461     | Hunan    | -    | -    | +     | -    | -    | +     |

| Samples | Province | qPCR |      |       | PCR  |      |       |
|---------|----------|------|------|-------|------|------|-------|
|         |          | PEDV | TGEV | PDCoV | PEDV | TGEV | PDCoV |
| 462     | Hunan    | -    | -    | +     | -    | -    | +     |
